# Supplementary material for: Ambient Benzo[a]pyrene’s Effect on Kinetic Modulation of Amyloid Beta Peptide Aggregation: A Tentative Association between Ultrafine Particulate Matter and Alzheimer’s Disease
Source: MDPI journal article supplement (doi:10.3390/toxics10120786), 2022-12-14
Supplement: s1 [file s1]

## Supplementary Material

*“Ambient benzo[a]pyrene’s effect on kinetic modulation of amyloid beta peptide aggregation: a tentative association between ultrafine particulate matter and Alzheimer’s disease”*

By Samal Kaumbekova, Mehdi Amouei Torkmahalleh, and Dhawal Shah

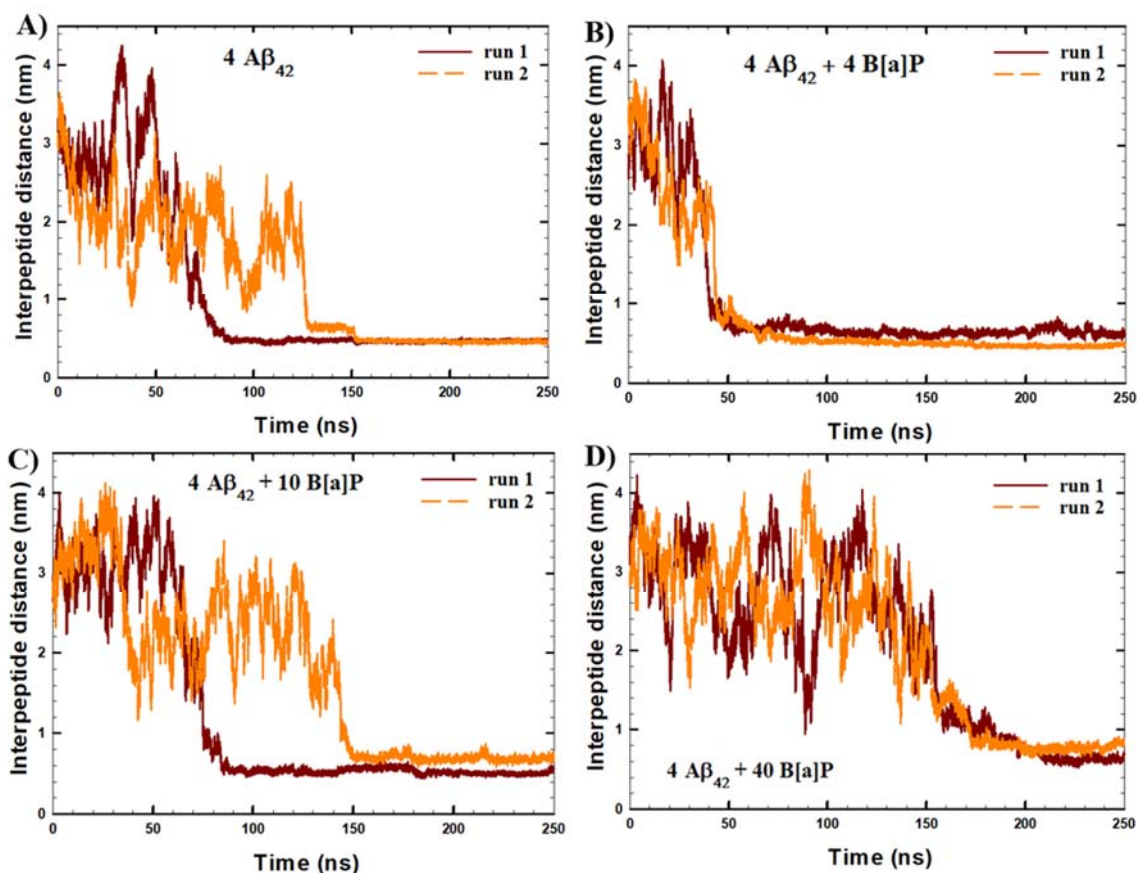

**Figure S1.** Time-evolution of average interpeptide distances in the systems with additional replicas: A) 4 A $\beta_{42}$  peptides, B) 4 A $\beta_{42}$  peptides and 4 B[a]P, C) 4 A $\beta_{42}$  peptides and 10 B[a]P, D) 4 A $\beta_{42}$  peptides and 40 B[a]P.

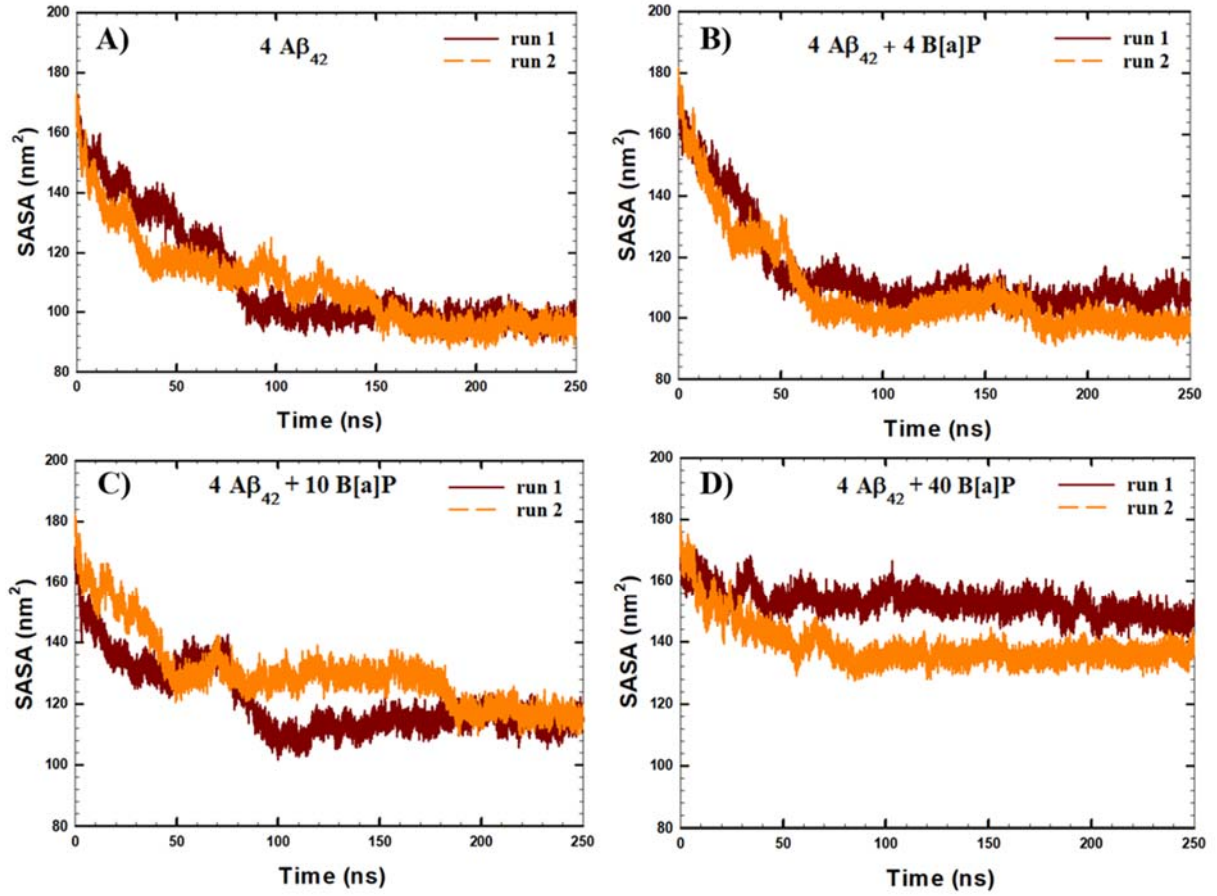

**Figure S2.** Time-evolution of Solvent Accessible Surface Area (SASA) of  $\text{A}\beta_{42}$  peptides in the systems with additional replicas: A) 4  $\text{A}\beta_{42}$  peptides, B) 4  $\text{A}\beta_{42}$  peptides and 4 B[a]P, C) 4  $\text{A}\beta_{42}$  peptides and 10 B[a]P, D) 4  $\text{A}\beta_{42}$  peptides and 40 B[a]P.
